# Supplementary material for: Structural and dynamic changes in P-Rex1 upon activation by PIP3 and inhibition by IP4
Source: eLife journal article supplement (doi:10.7554/elife.92822), 2023-12-20

# Ribbon Map of P-Rex1 (% deuteration)

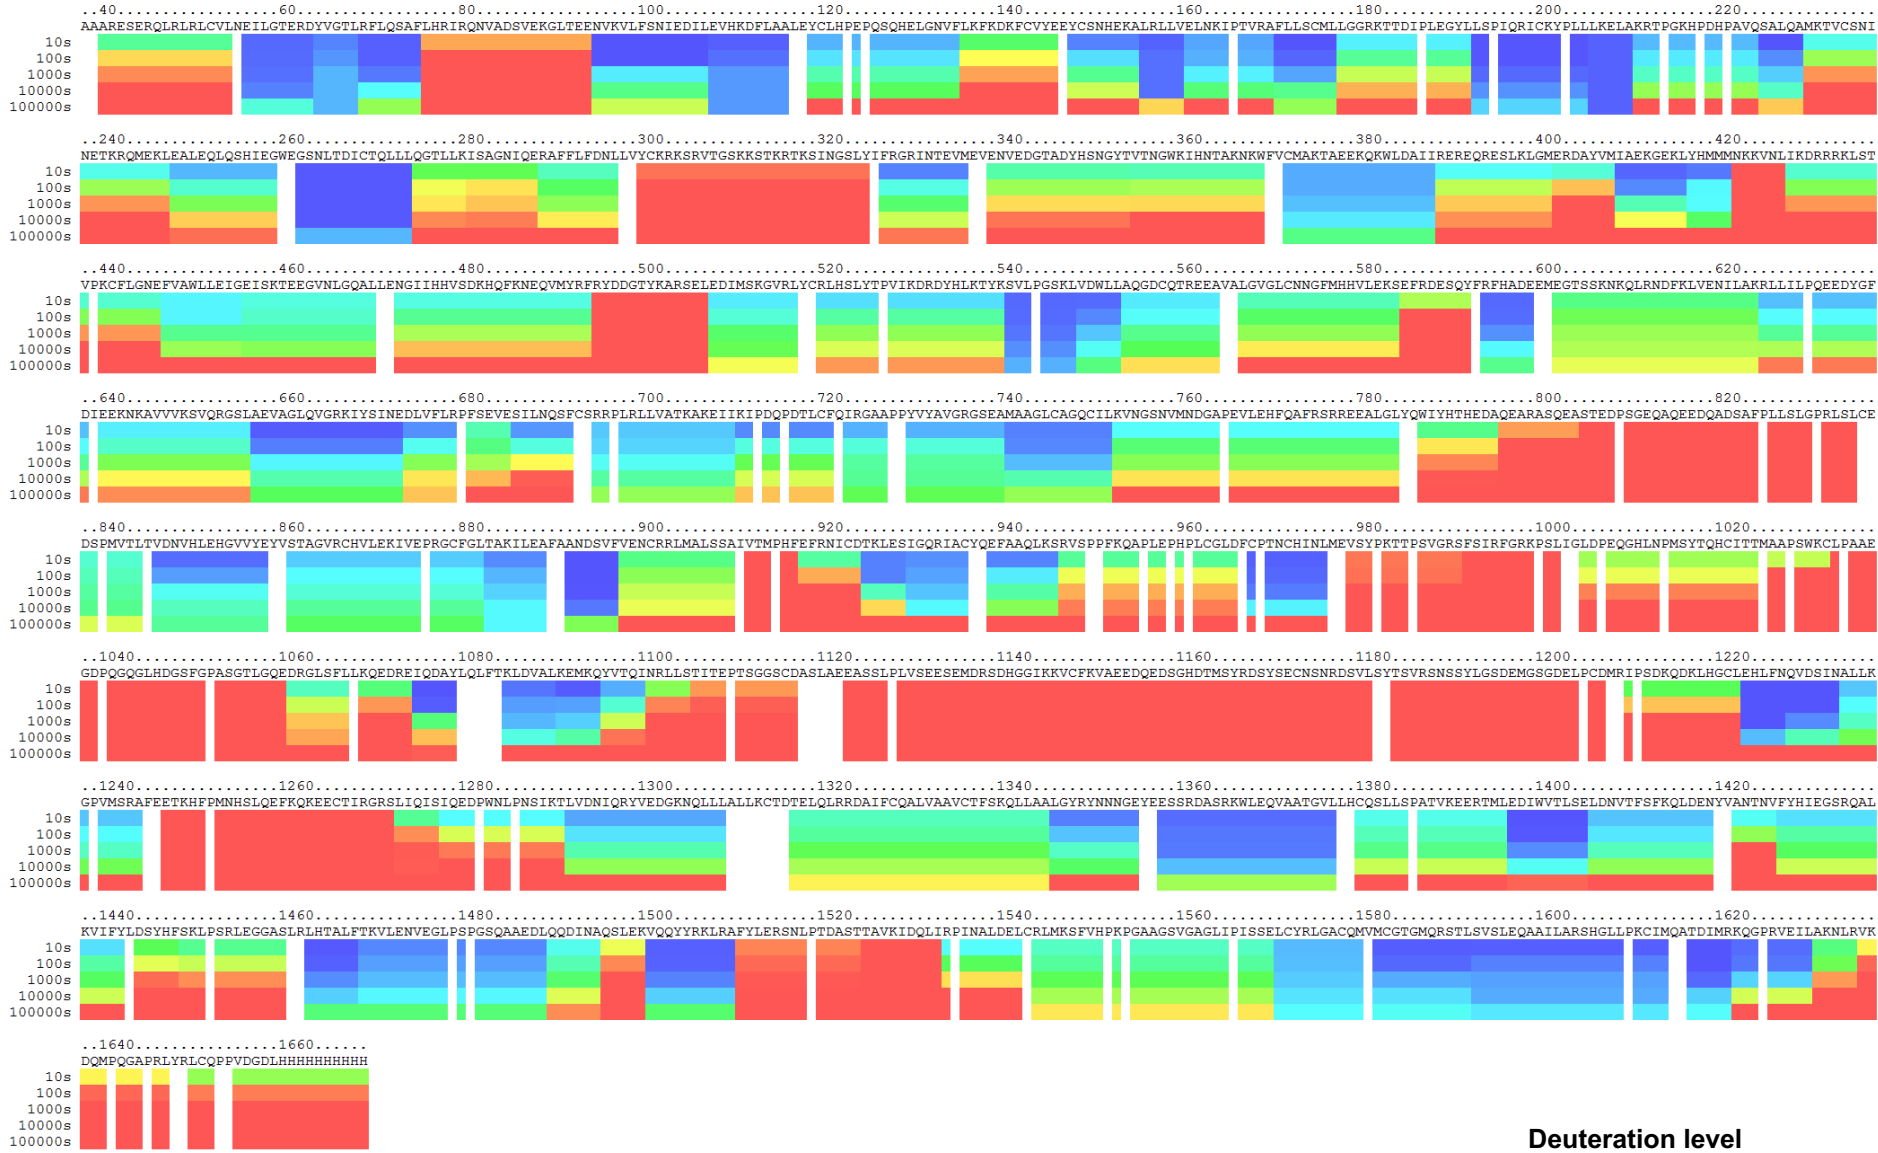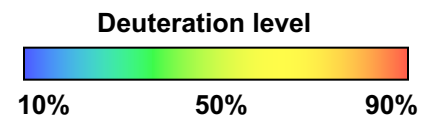

# Ribbon Map of P-Rex1 in P-Rex1·IP<sub>4</sub> Complex (% deuteration)

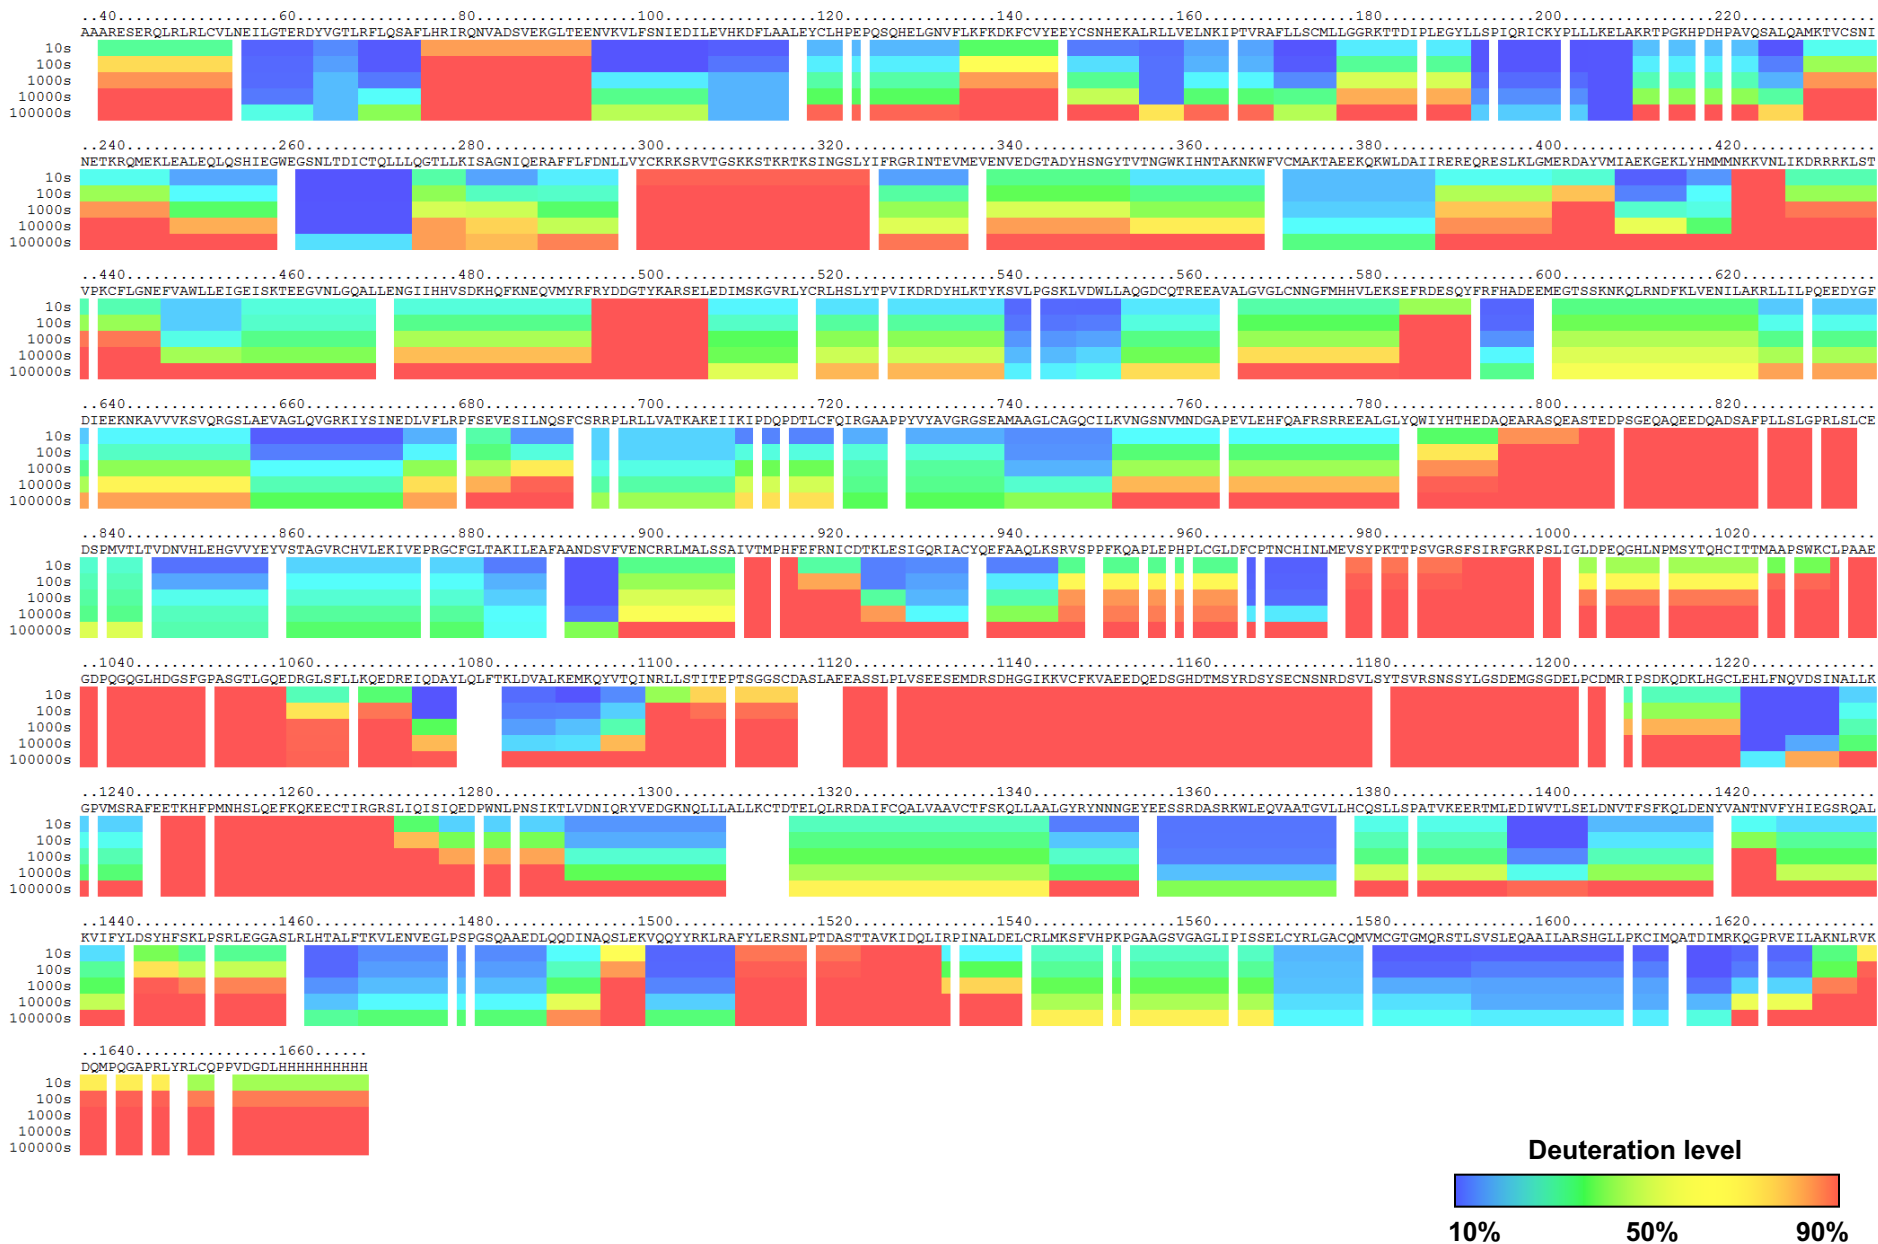

# Influence of IP<sub>4</sub> on Exchange in P-Rex1 (% deuteration)

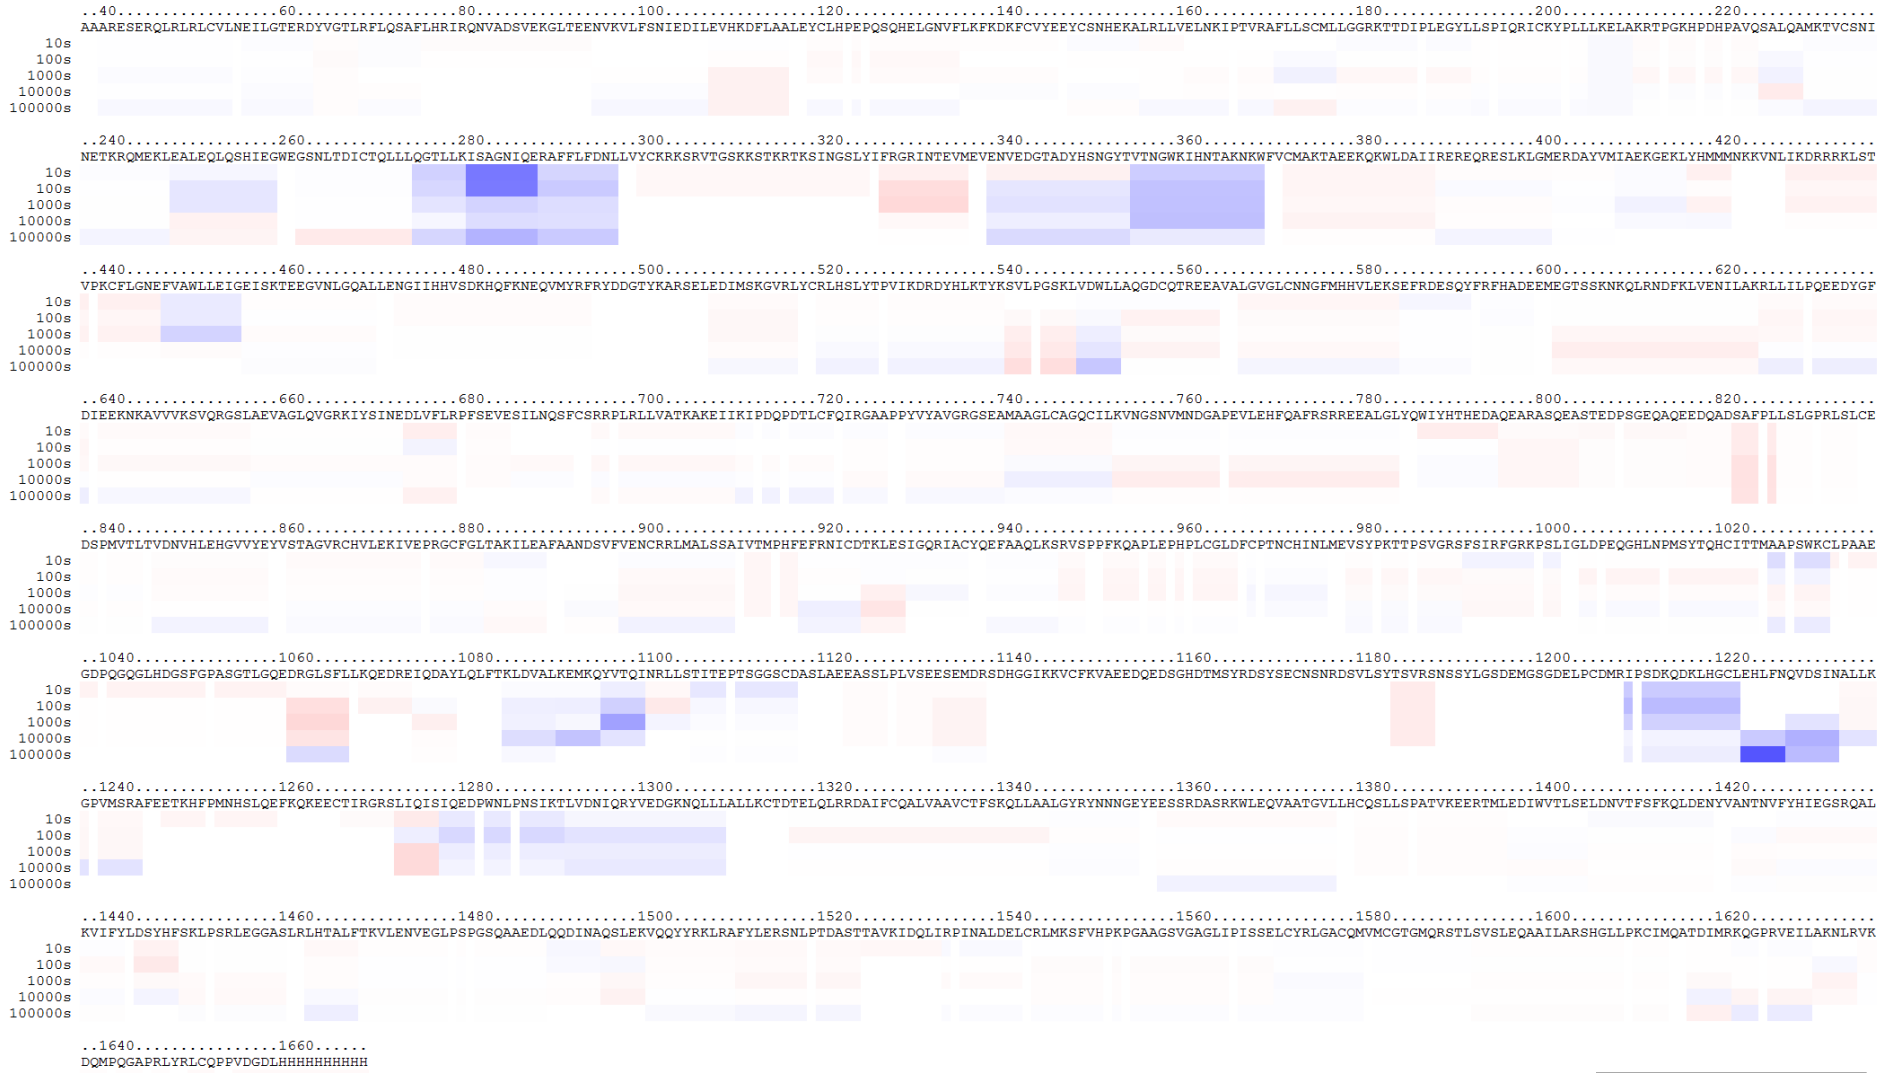

Blue indicates regions that exchange slower in the presence of IP<sub>4</sub>.  
Red indicates regions that exchange faster.

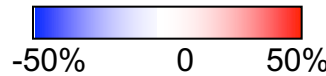

Supplement: fig4-data1 [file elife-92822-fig4-data1-v1.pdf]
