# Supplementary material for: Structural and dynamic changes in P-Rex1 upon activation by PIP3 and inhibition by IP4
Source: eLife journal article supplement (doi:10.7554/elife.92822), 2023-12-20

# Ribbon Map of P-Rex1 (% deuteration)

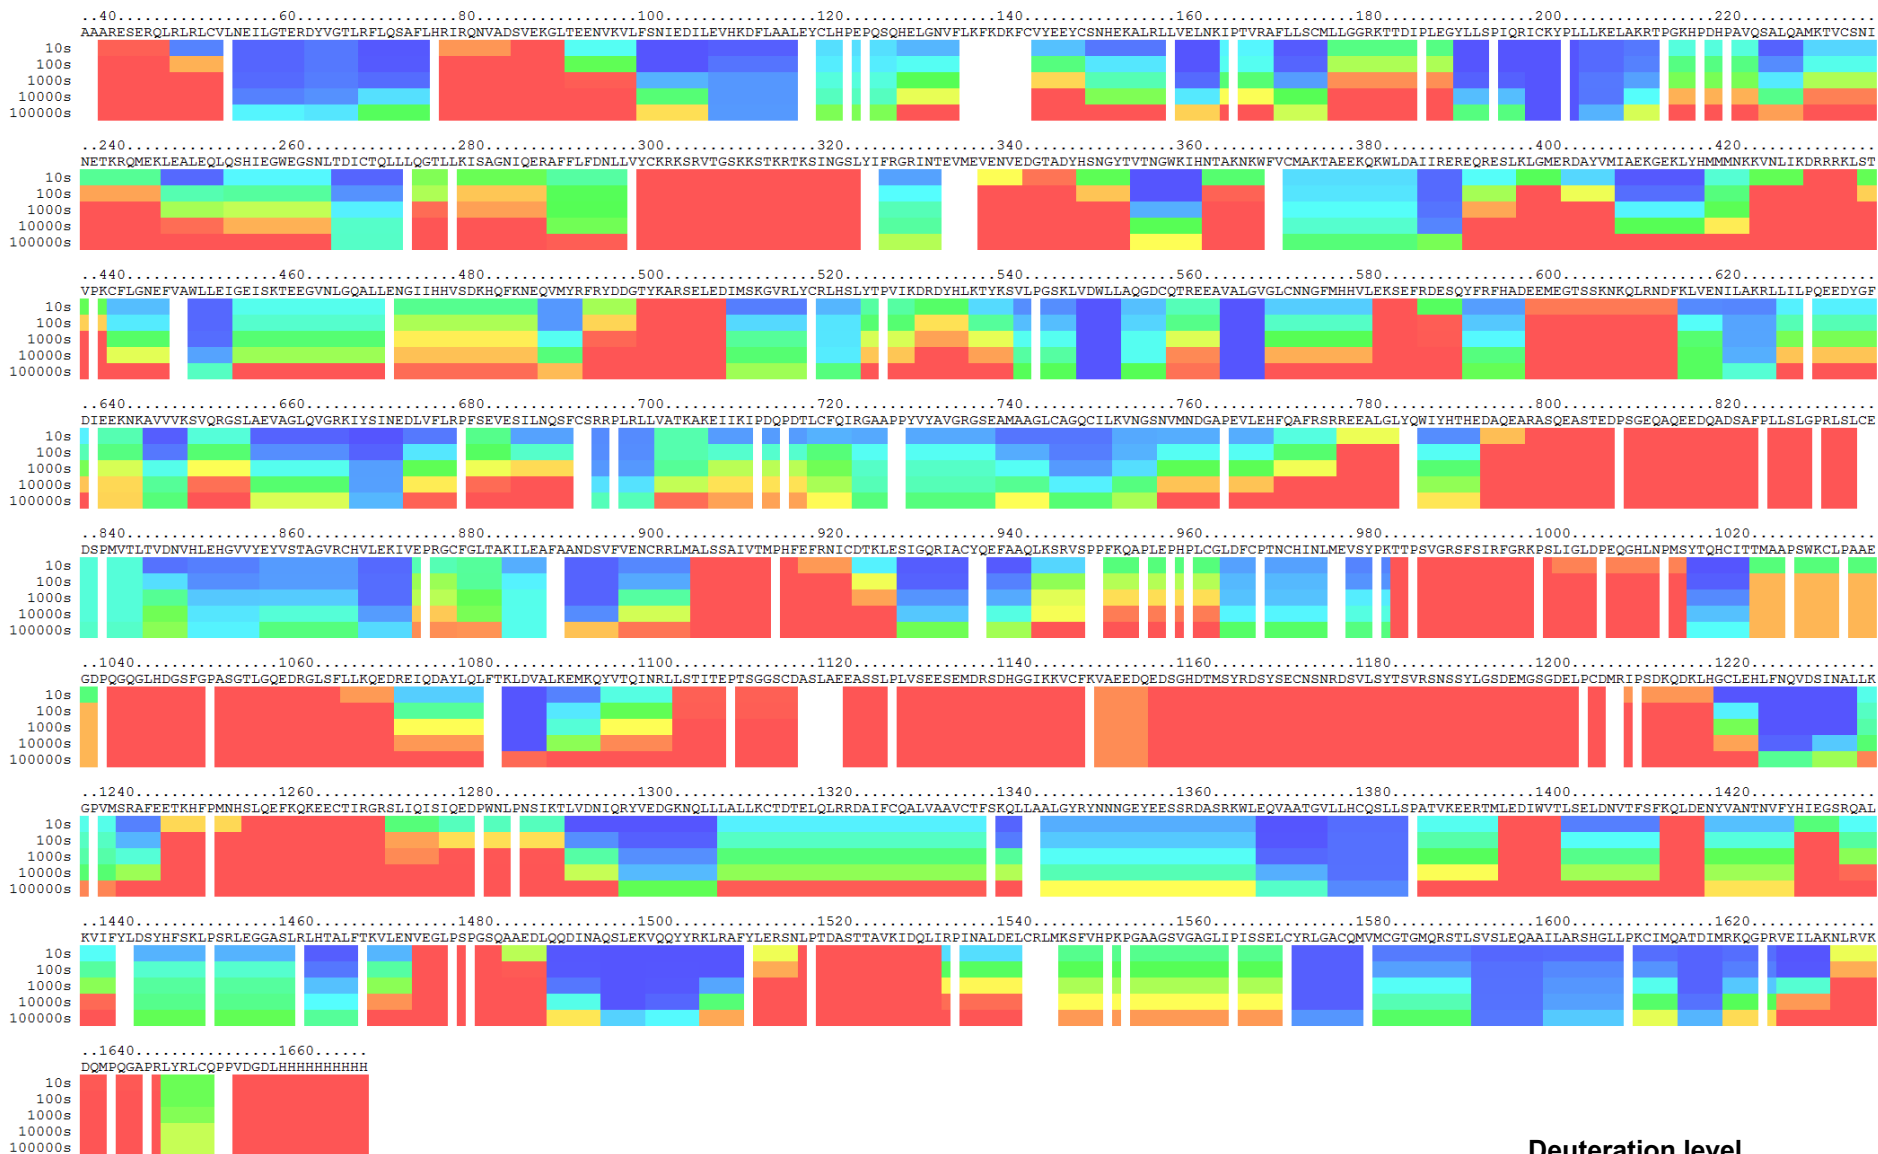

# Ribbon Map of P-Rex1 in the presence of PIP<sub>3</sub>-containing liposomes (% deuteration)

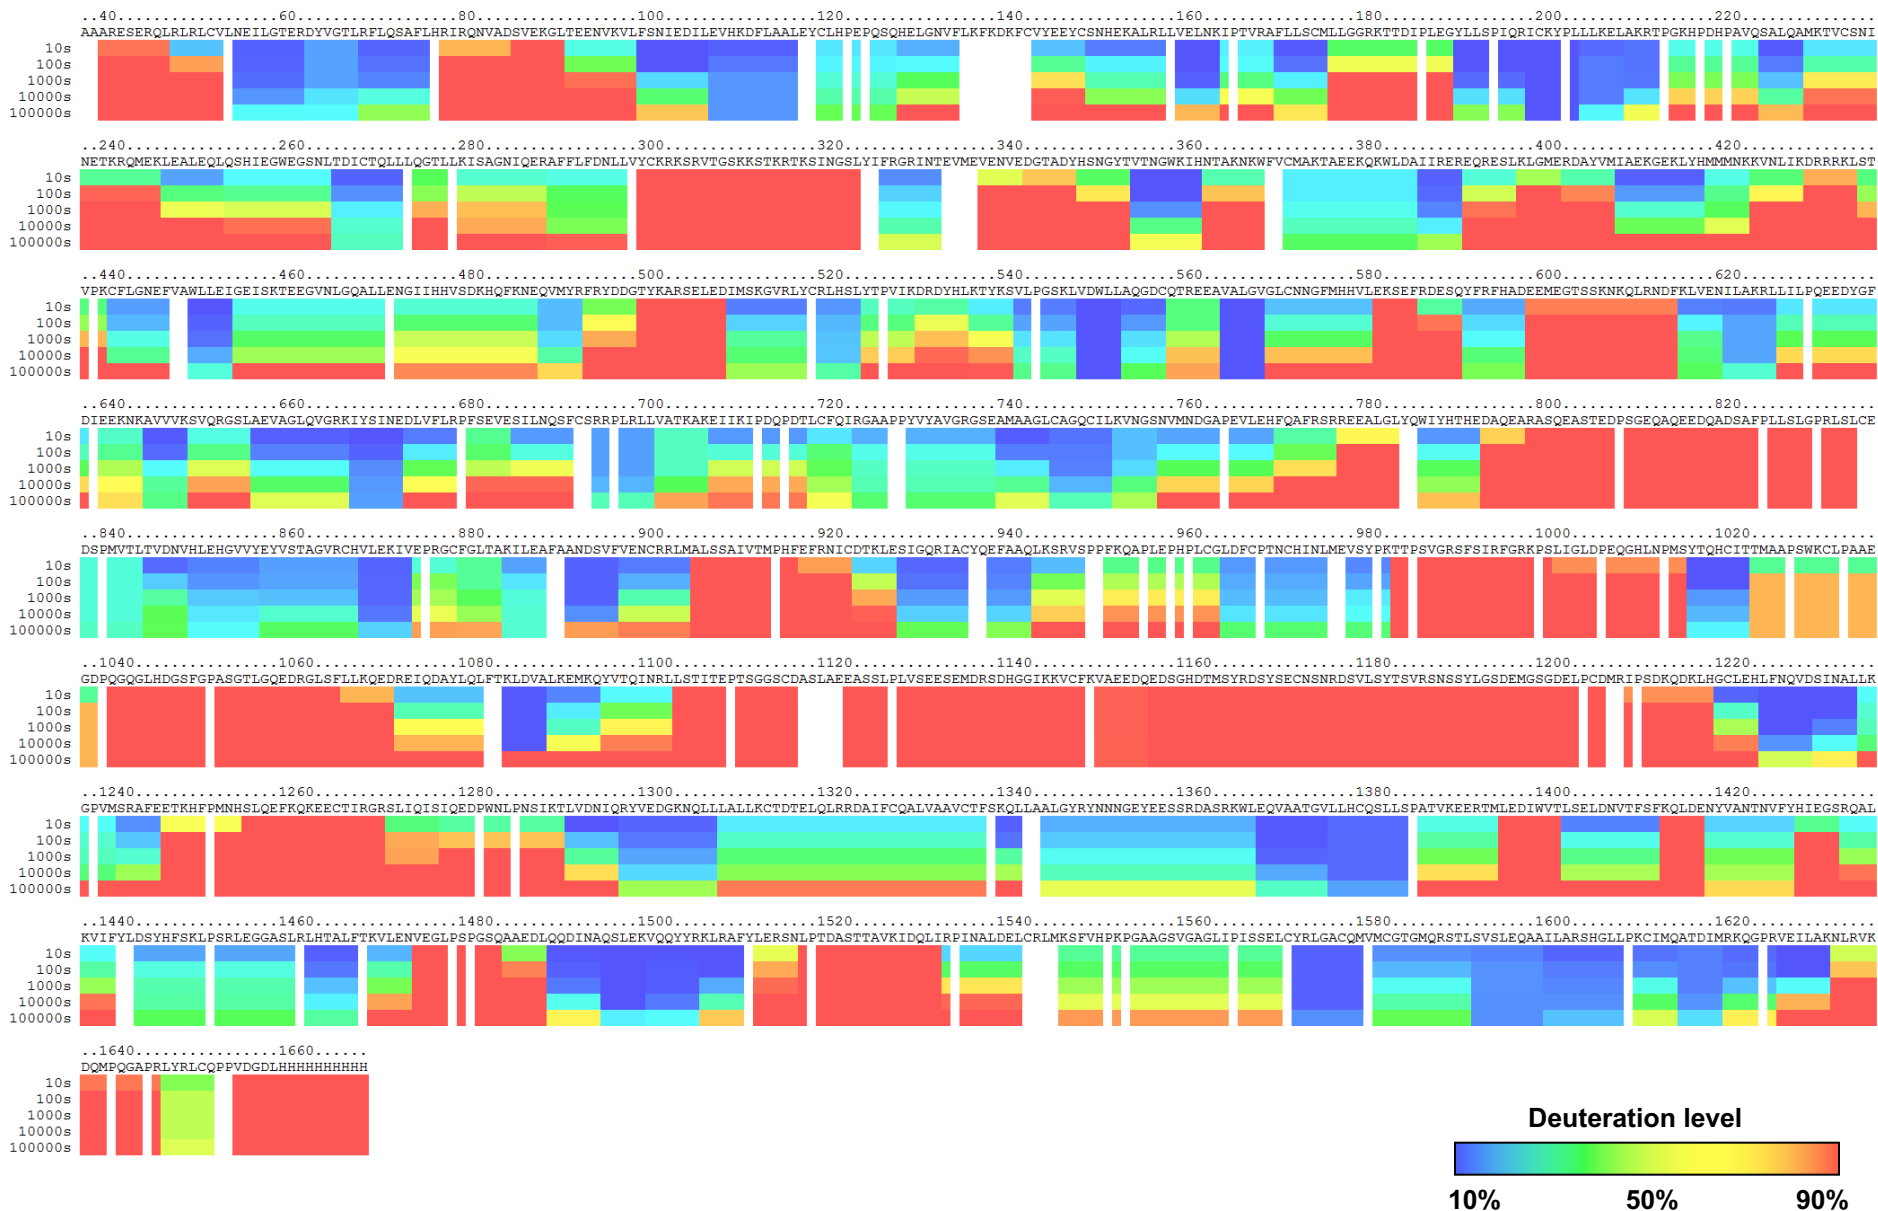

# Ribbon Map of P-Rex1 in the presence of liposomes without PIP<sub>3</sub> (% deuteration)

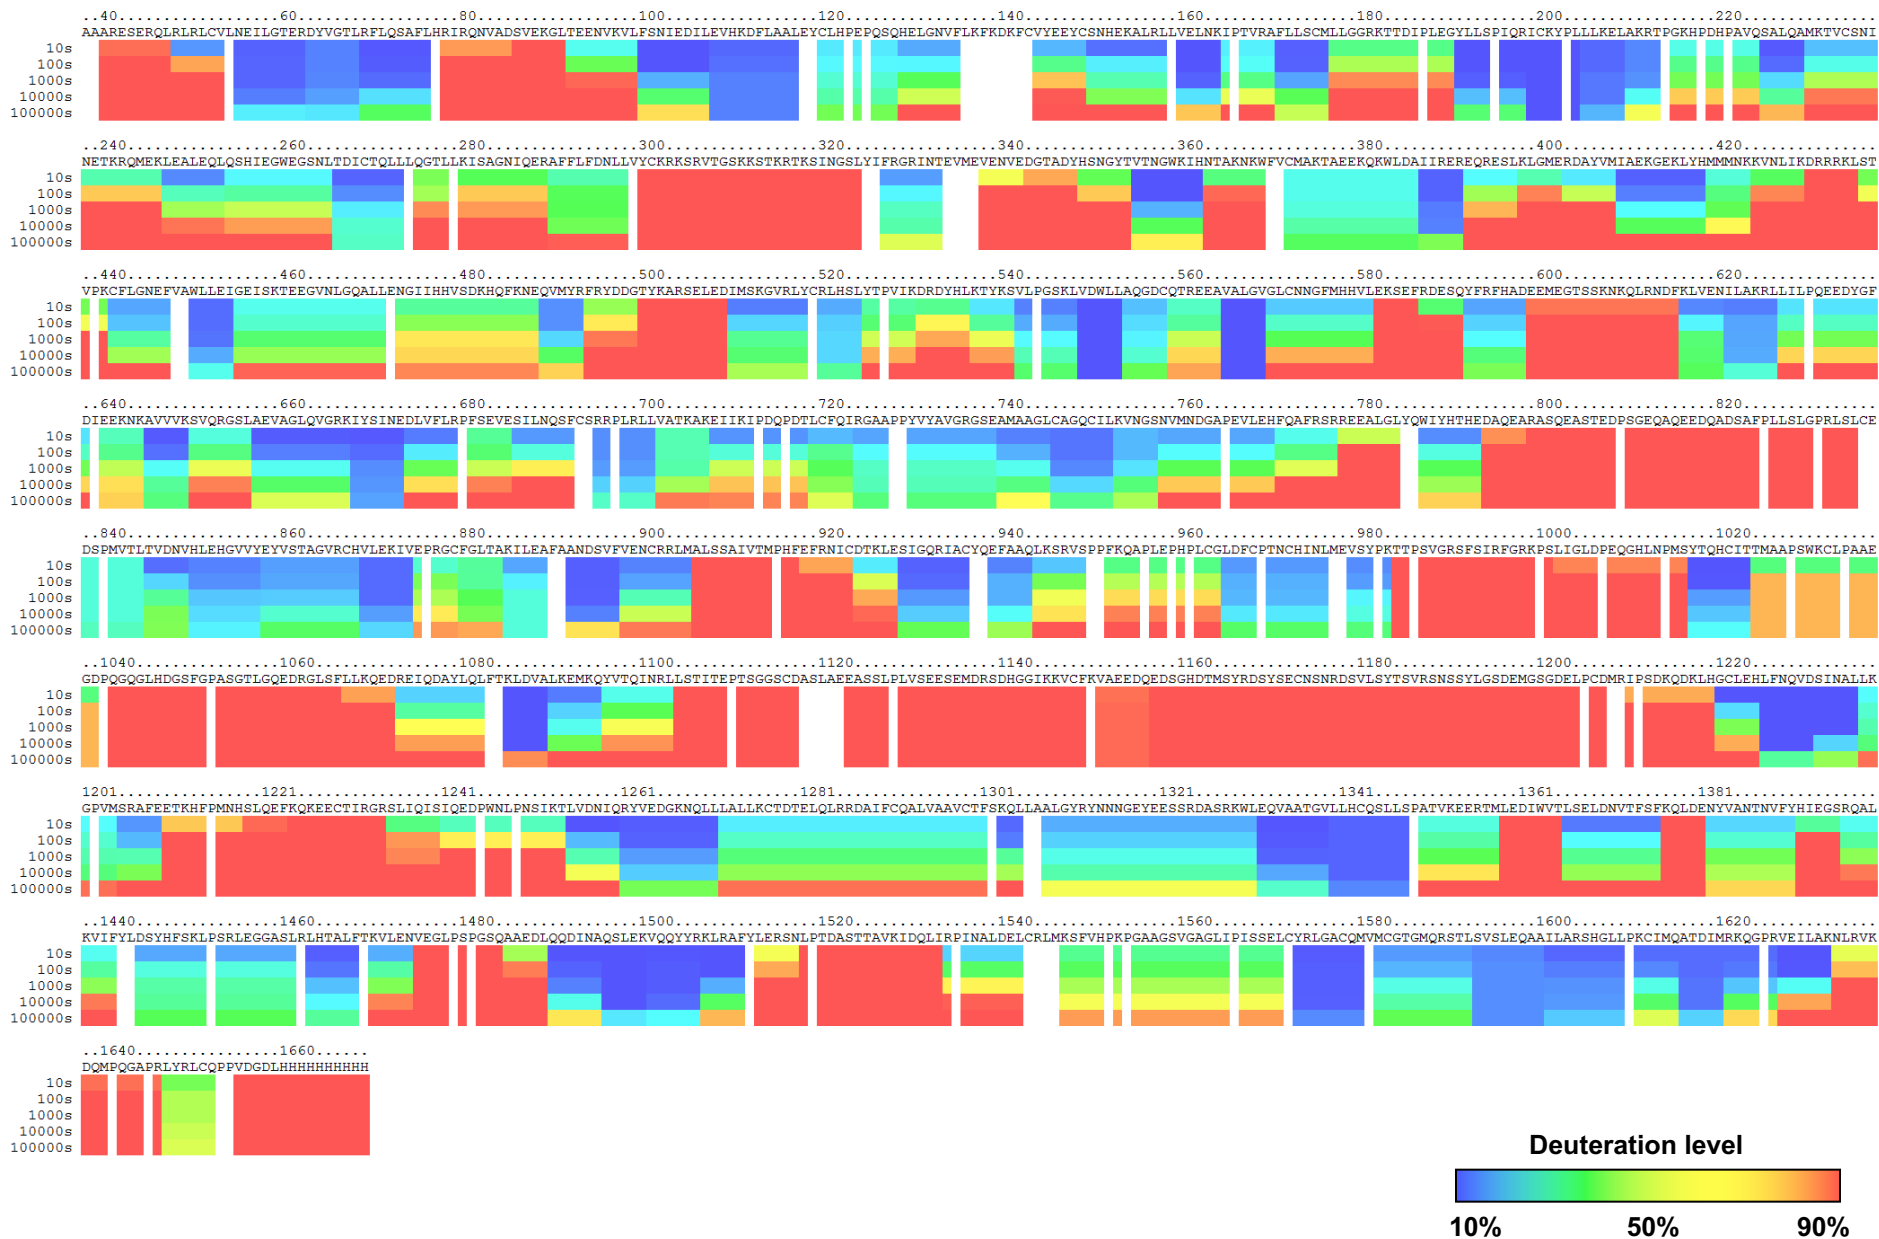

# Difference Map: P-Rex1-PIP<sub>3</sub>-containing liposomes Minus P-Rex1 (% deuteration)

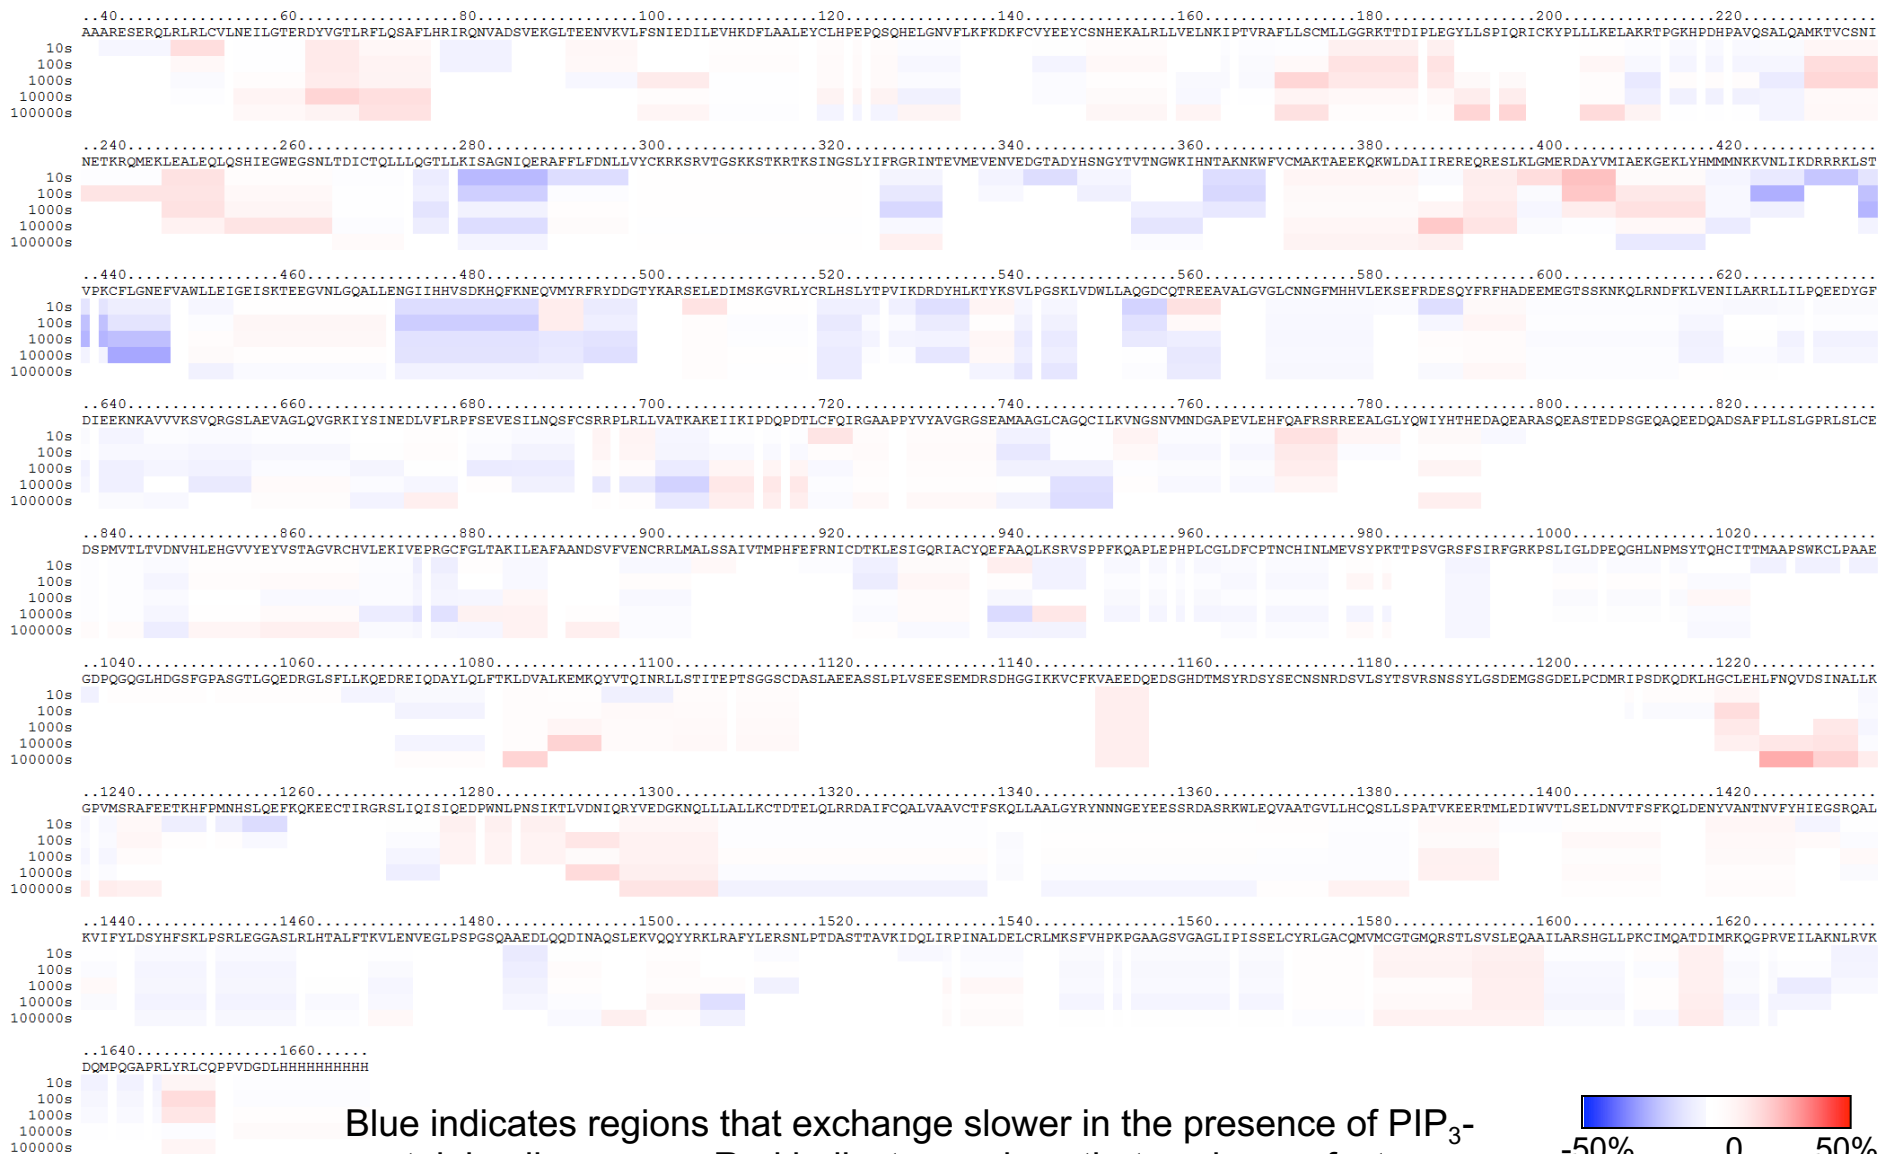

# Difference Map: P-Rex1–liposomes Minus P-Rex1 (% deuteration)

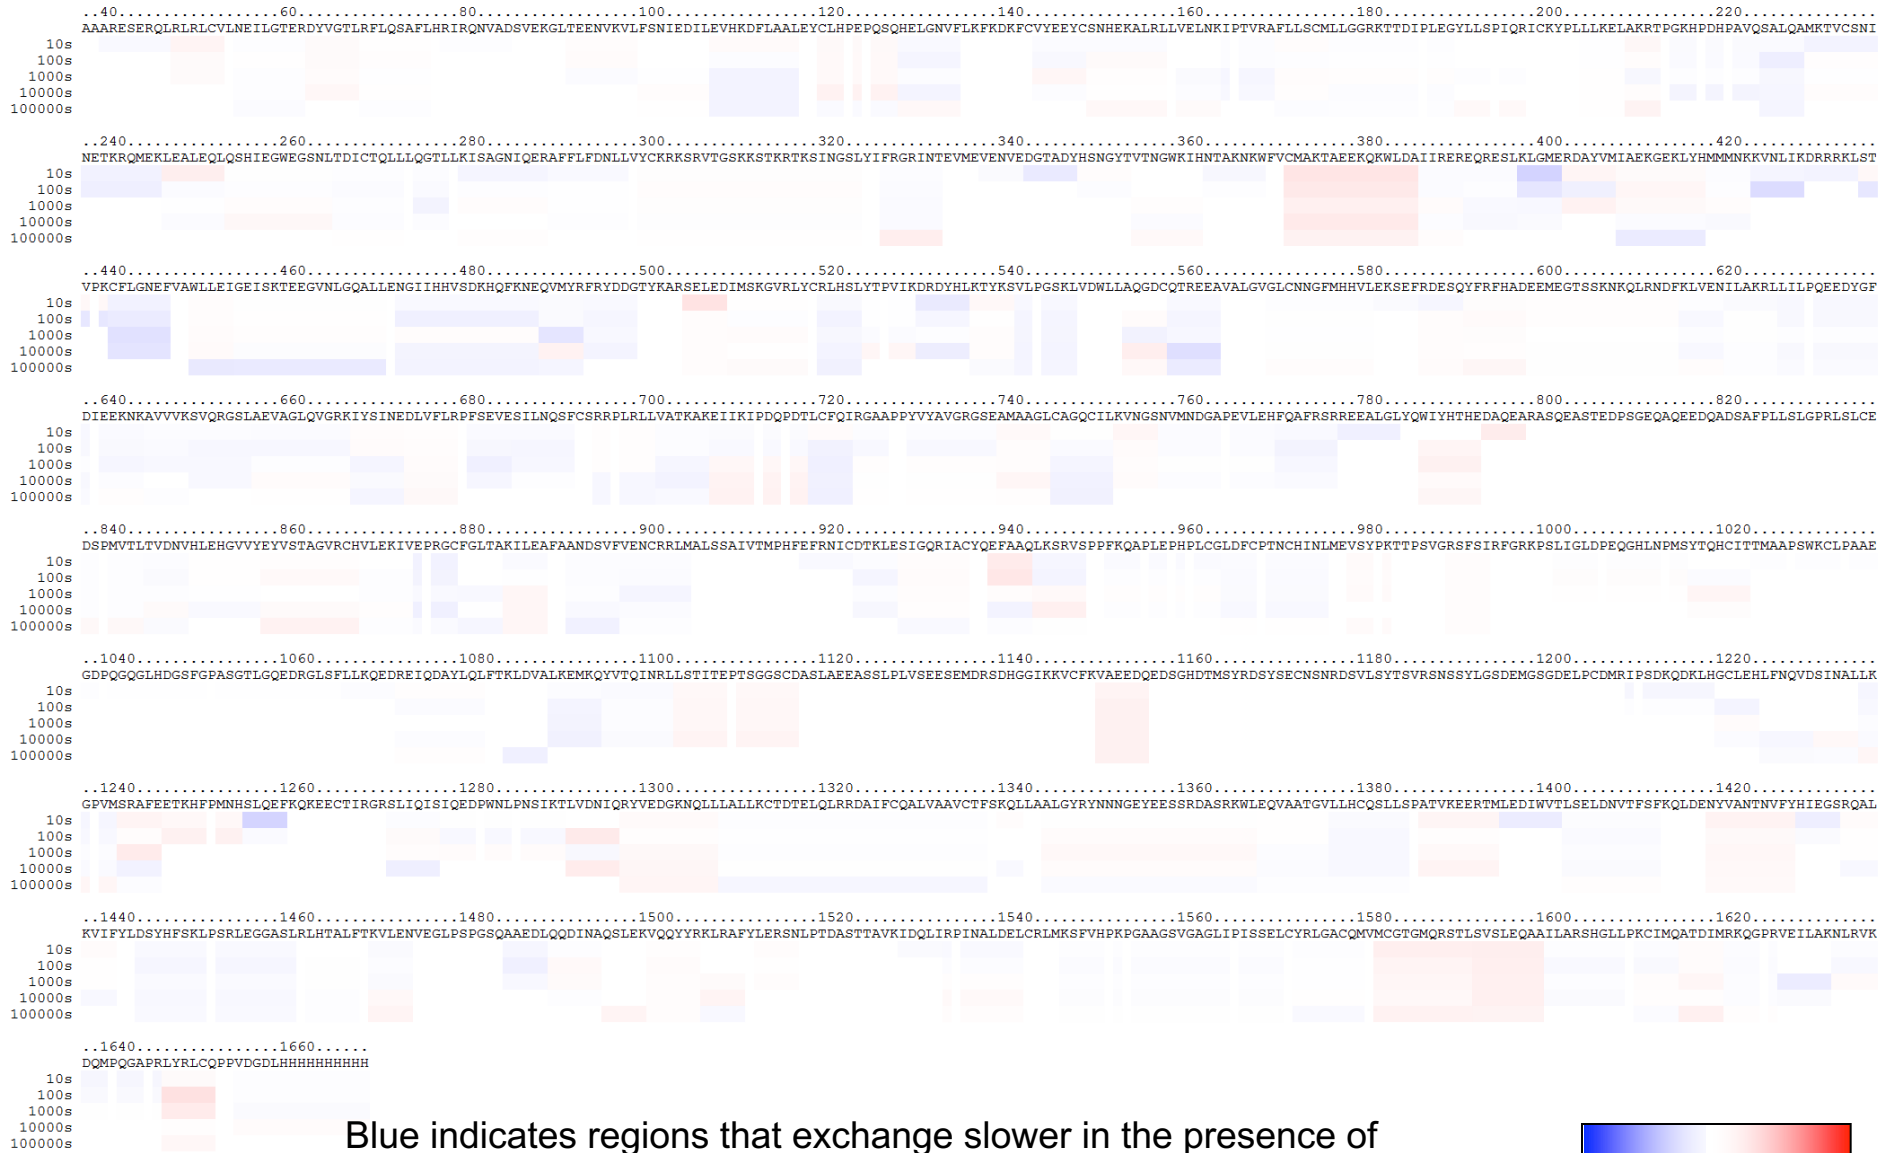

Blue indicates regions that exchange slower in the presence of liposomes without PIP<sub>3</sub>. Red indicates regions that exchange faster.

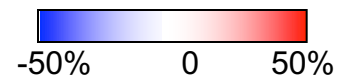

Supplement: fig6-data1 [file elife-92822-fig6-data1-v1.pdf]
